# Supplementary material for: Enhanced Operating Temperature Stability of Organic Solar Cells with Metal Oxide Hole Extraction Layer
Source: MDPI journal article supplement (doi:10.3390/polym12040992), 2020-04-24
Supplement: s1 [file s1]

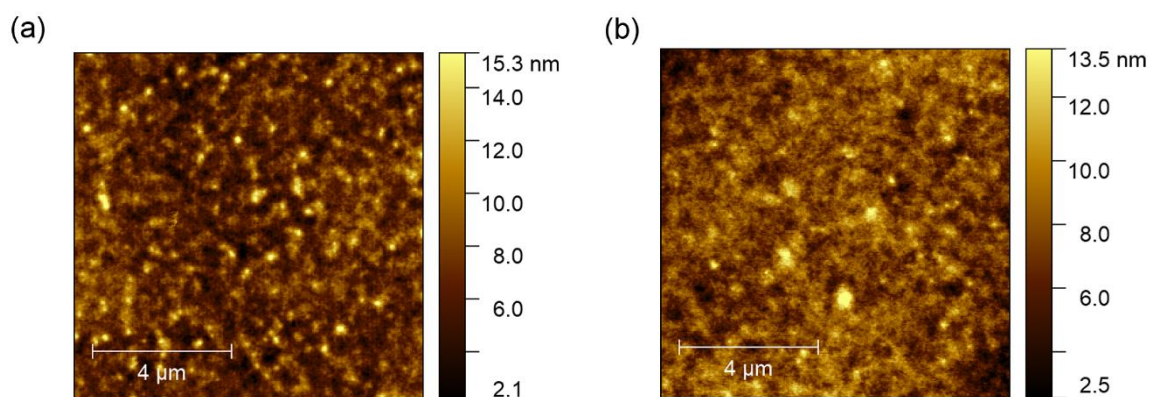

**Figure S1.** AFM topography of P3HT:PCBM films on (a) PEDOT:PSS and (b) MoO<sub>3</sub>. Root-mean-square (RMS) roughness of P3HT:PCBM film on PEDOT:PSS and MoO<sub>3</sub> were 1.92 nm and 1.58 nm, respectively.

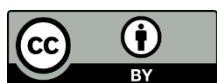

© 2020 by the authors. Submitted for possible open access publication under the terms and conditions of the Creative Commons Attribution (CC BY) license (<http://creativecommons.org/licenses/by/4.0/>).
